# Supplementary material
Source: Springer Nature journal article supplement (https://mijn.bsl.nl/resource/supplementary/13047_2012_468_MOESM5_ESM.pdf/7111574)

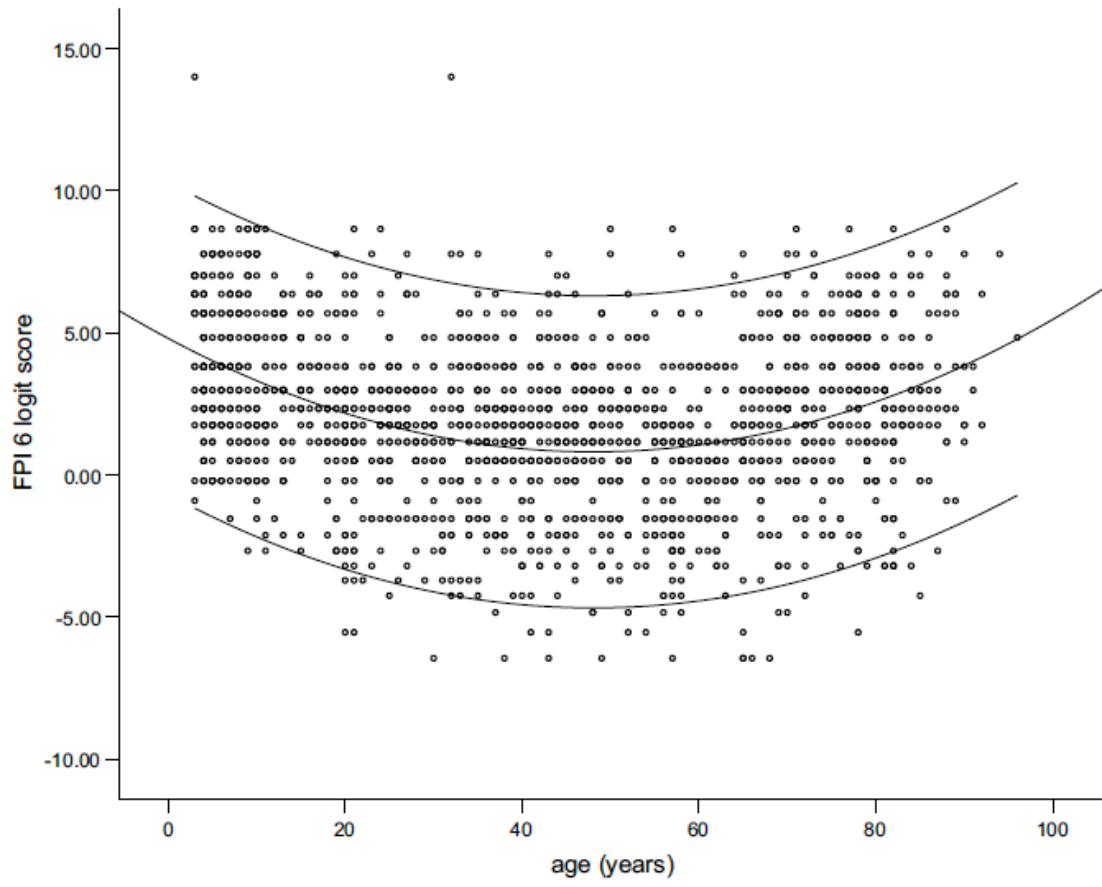

Supplement: MOESM5 [file 7111574]
